# Supplementary material for: Updating the genomic taxonomy and epidemiology of Campylobacter hyointestinalis
Source: PubMed Central journal article supplement (PMC5799301; doi:10.1038/s41598-018-20889-x), 2018-02-05
Supplement: 41598_2018_20889_MOESM1_ESM.pdf [file 41598_2018_20889_MOESM1_ESM.pdf]

## Supplementary Information For:

# Updating the genomic taxonomy and epidemiology of *Campylobacter hyointestinalis*.

David A Wilkinson<sup>1\*</sup>, Andrew J O'Donnell<sup>2</sup>, Rukhshana N Akhter<sup>1</sup>, Ahmed Fayaz<sup>1</sup>, Hamish J Mack<sup>1</sup>, Lynn E Rogers<sup>1</sup>, Patrick J Biggs<sup>1,3</sup>, Nigel P French<sup>1,3</sup>, Anne C Midwinter<sup>1</sup>

1 Molecular Epidemiology and Public Health Laboratory (<sup>m</sup>EpiLab), Institute of Veterinary, Animal and Biomedical Sciences, Massey University, Palmerston North, New Zealand

2 Faculty of Veterinary Science, University of Liverpool, Leahurst, Cheshire, CH64 7TE. United Kingdom

3 New Zealand Food Safety Science and Research Centre, Massey University, Palmerston North, New Zealand

\* Denotes corresponding author.

**Correspondence:** E-Mail: D.A.Wilkinson@massey.ac.nz

Telephone: +64 (06) 356 9099 extn 85752

**Correspondence for proofs:** Molecular Epidemiology and Public Health Laboratory (<sup>m</sup>EpiLab), Massey University, Tennent Drive, Private Bag 11-222, Palmerston North, 4442.

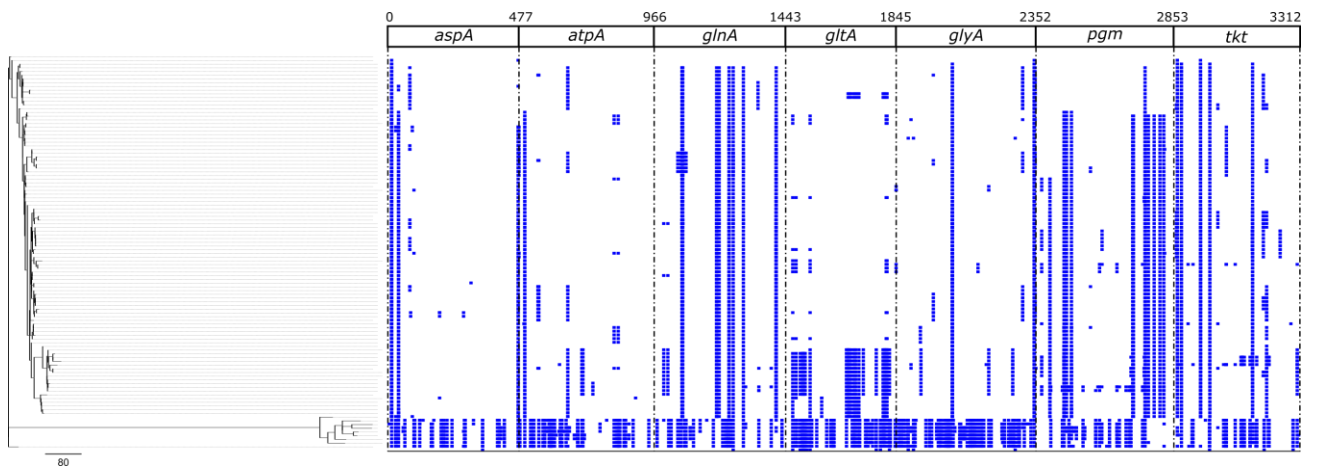

Supplementary figure 1: Prediction of recombinant sites within the *C. hyointestinalis* seven-gene MLST scheme

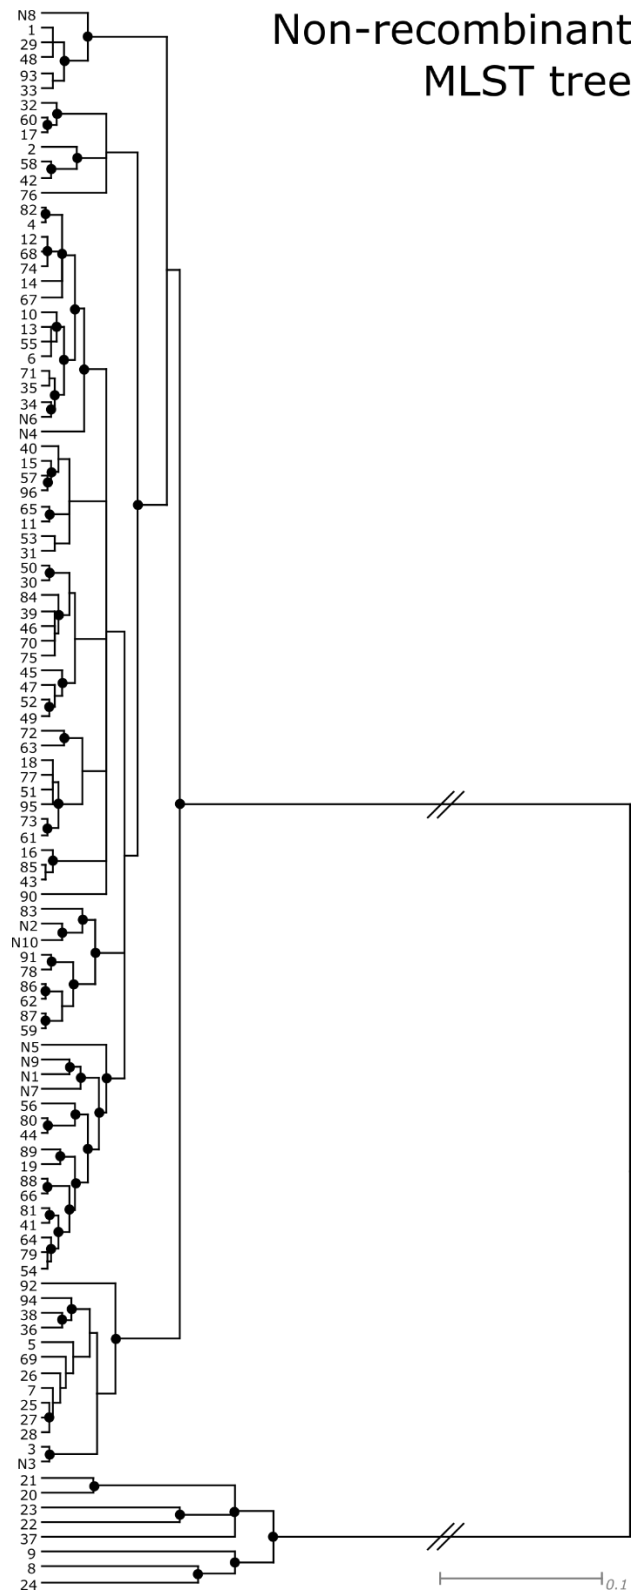

Supplementary Figure 2: Recombination-stripped MLST gene tree for all reported *C. hyointestinalis* sequence types in PubMLST. New allelic profiles were assigned as in Supplementary Table S3. Circular points indicate nodes with posterior probabilities >0.95.

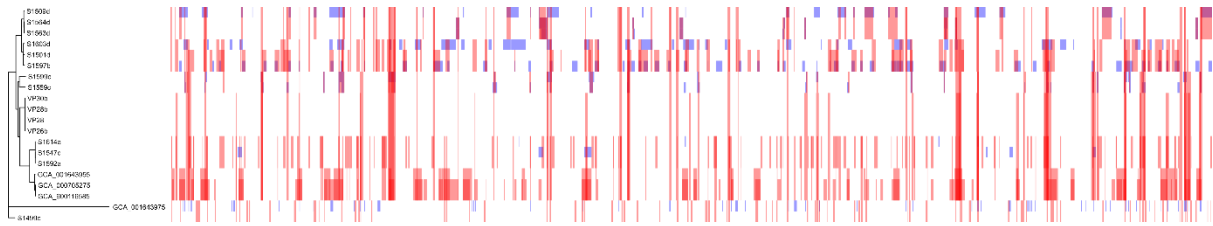

Supplementary Figure 3: Prediction of recombinant sites within the *C. hyointestinalis* whole genome gene alignment. The presented phylogeny shows the predicted relationship between isolates based on non-recombinant regions. Blue bars highlight genomic loci that are predicted to have undergone recombination within single genomes, whereas red bars denote recombinant regions that are predicted to be shared between multiple genomes.

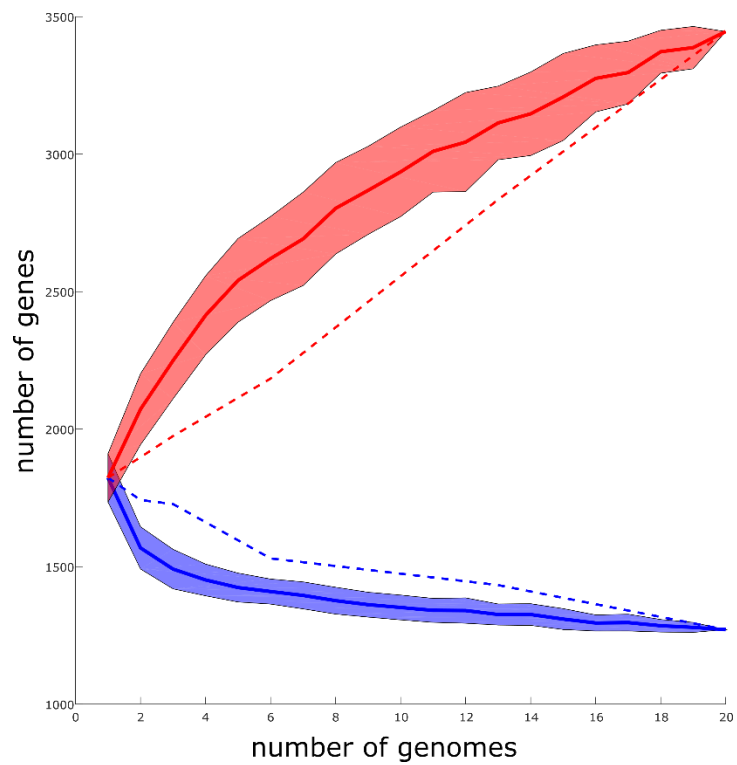

Supplementary Figure 4: Rarefaction analysis of the core genome (blue) and pangenome (red) of *C. hyointestinalis* genomes. Dotted lines indicate the rate of core/pangenome decay when constrained to genome clusters defined by the hierarchical clusters method depicted in main figure 5.

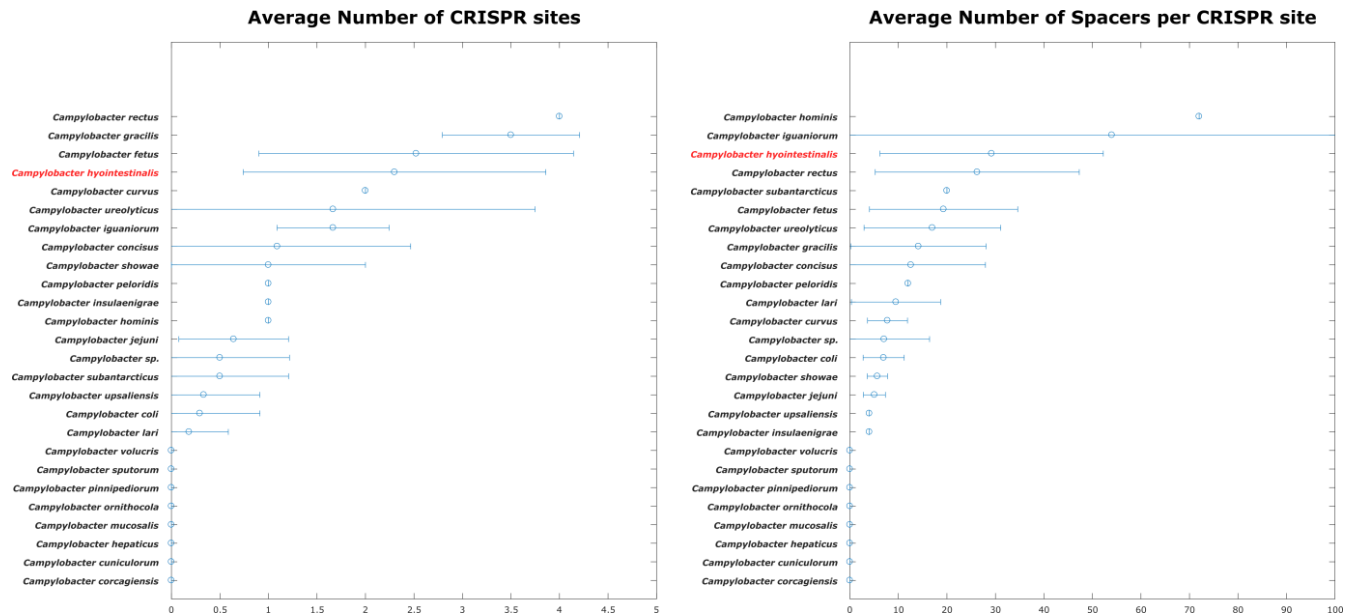

Supplementary Figure 5: Average  $\pm$  standard deviation of the number of CRISPR sites (left) and number of spacer regions (right) per *Campylobacter* species, as identified from 1,884 available genomes from across the *Campylobacteraceae* family.

Cdt Subunit A

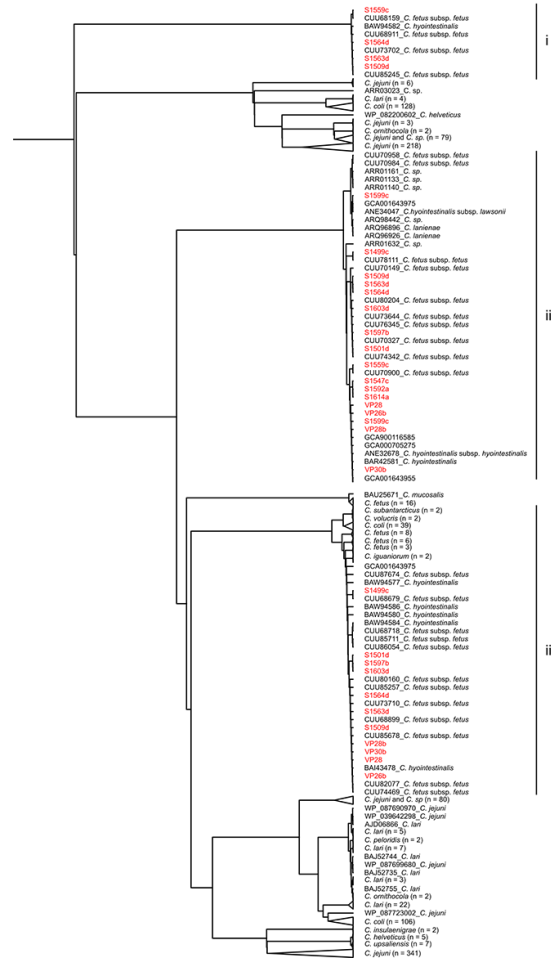

Cdt Subunit B

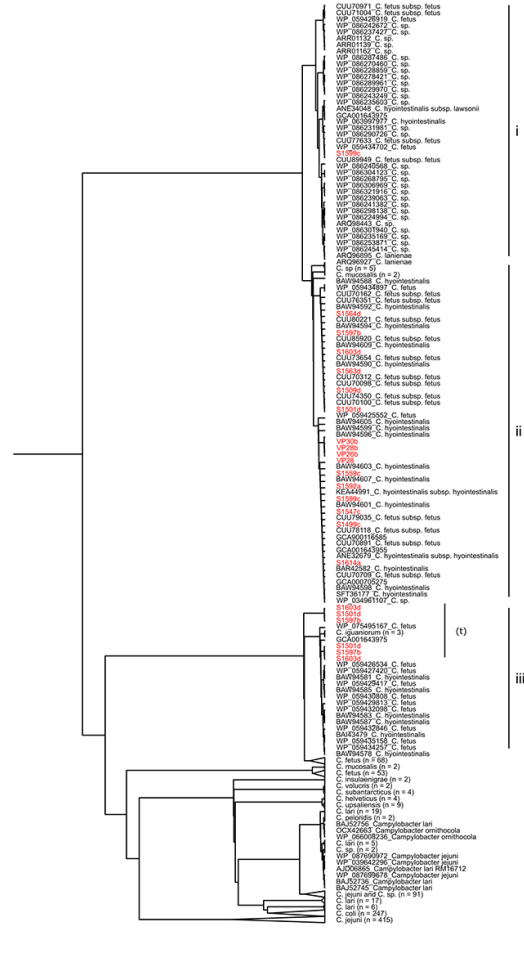

Cdt Subunit C

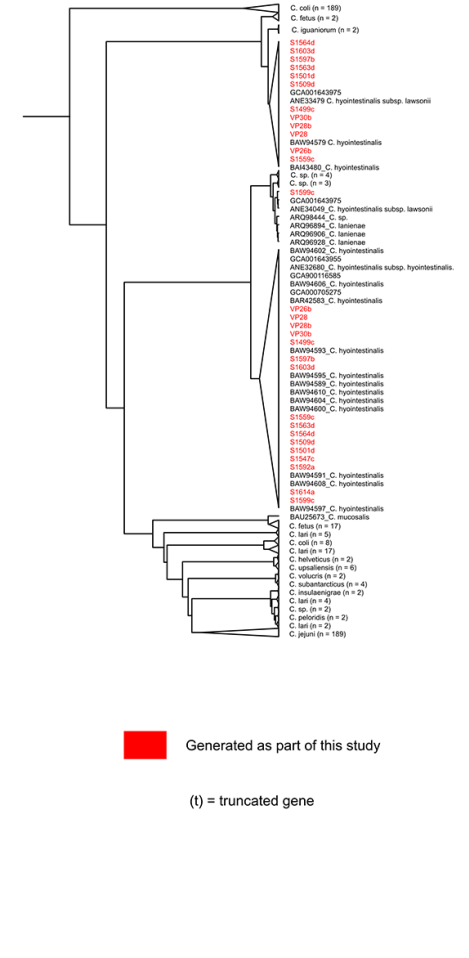

Generated as part of this study  
(t) = truncated gene

Supplementary Figure 6: UPGMA gene trees of cytolethal distending toxin (CDT) subunits identified within genomes of *C. hyointestinalis* generated as part of this study (red), and compared to all available CDT data available in the NCBI protein repository (black). Groups are defined based on phylogenetic relatedness, as shown, for each subunit.

| Species | Pooled swabs | # tested (# swabs) | # samples from which <i>Campylobacter</i> was isolated (%) | # identified with <i>C. jejuni/ C. coli</i> (%) | # identified with <i>C. hyointestinalis</i> (%) |
|---------|--------------|--------------------|------------------------------------------------------------|-------------------------------------------------|-------------------------------------------------|
| Cattle  | Y            | 77 (308)           | 73 (94%)                                                   | 57 (74%)                                        | 28 (36%)                                        |
| Sheep   | Y            | 68 (272)           | 35 (51%)                                                   | 29 (42%)                                        | 6 (9%)                                          |
| Deer    | N            | 80                 | 9 (11%)                                                    | 2 (3%)                                          | 8 (18%)                                         |
| TOTAL   | -            | 225                | 117 (52%)                                                  | 88 (39%)                                        | 48 (21%)                                        |

Supplementary Table S1: Diagnostic results for *C. jejuni/C. coli* and *C. hyointestinalis* from cattle, sheep and deer faeces.



| Isolate | Accession Number | Contigs | Average Fold-Coverage | Genome Size (Mbp) | GC Content (%) | N50    | Coding regions | rRNA copies | tRNA copies |
|---------|------------------|---------|-----------------------|-------------------|----------------|--------|----------------|-------------|-------------|
| S1499c  | NIQE00000000     | 52      | 73                    | 1.93              | 35.0           | 178581 | 2049           | 2           | 42          |
| S1501d  | NIQF00000000     | 39      | 71                    | 1.73              | 35.4           | 217497 | 1809           | 2           | 42          |
| S1509d  | NIQG00000000     | 37      | 83                    | 1.78              | 35.0           | 197085 | 1857           | 2           | 42          |
| S1547c  | NIQH00000000     | 79      | 94                    | 1.81              | 35.9           | 145507 | 1891           | 2           | 42          |
| S1559c  | NIQI00000000     | 29      | 133                   | 1.78              | 36.2           | 556818 | 1864           | 2           | 43          |
| S1563d  | NIQJ00000000     | 51      | 85                    | 1.76              | 34.8           | 78373  | 1865           | 2           | 42          |
| S1564d  | NIQK00000000     | 76      | 71                    | 1.78              | 34.4           | 83731  | 1868           | 2           | 40          |
| S1592a  | NIQL00000000     | 42      | 83                    | 1.81              | 36.1           | 175279 | 1901           | 2           | 42          |
| S1597b  | NIQM00000000     | 57      | 98                    | 1.77              | 34.7           | 308874 | 1859           | 2           | 42          |
| S1599c  | NIQN00000000     | 73      | 57                    | 1.78              | 36.3           | 439663 | 1841           | 2           | 42          |
| S1603d  | NIQO00000000     | 41      | 89                    | 1.72              | 34.5           | 255033 | 1799           | 2           | 42          |
| S1614a  | NIQP00000000     | 50      | 112                   | 1.81              | 36.1           | 195895 | 1906           | 2           | 42          |
| VP26b   | NIQQ00000000     | 27      | 58                    | 1.70              | 37.0           | 242619 | 1713           | 2           | 42          |
| VP28    | NIQR00000000     | 44      | 98                    | 1.70              | 36.9           | 194759 | 1718           | 2           | 42          |
| VP28b   | NIQS00000000     | 37      | 55                    | 1.70              | 36.6           | 309452 | 1719           | 2           | 42          |
| VP30b   | NIQT00000000     | 63      | 48                    | 1.70              | 37.0           | 118626 | 1720           | 2           | 42          |

Supplementary Table S2: Genome assembly statistics

|        | <i>aspA</i> | <i>atpA</i> | <i>glnA</i> | <i>gltA</i> | <i>glyA</i> | <i>pgm</i> | <i>tkt</i> | ST  |
|--------|-------------|-------------|-------------|-------------|-------------|------------|------------|-----|
| S1603d | 1           | 1           | NEW_1       | 4           | 10          | NEW_1      | 10         | N1  |
| S1564d | 1           | 1           | NEW_2       | 4           | 8           | 4          | 12         | N2  |
| S1547c | 1           | 2           | 3           | 3           | 3           | 3          | 11         | N3  |
| S1592a | 1           | 2           | 3           | 3           | 3           | 3          | 11         | N3  |
| S1614a | 1           | 2           | 3           | 3           | 3           | 3          | 11         | N3  |
| S1599c | 1           | NEW_3       | 2           | 4           | 1           | 18         | NEW_1      | N4  |
| S1597b | 18          | NEW_2       | 1           | 4           | 10          | NEW_2      | 6          | N5  |
| S1559c | 19          | 1           | 5           | 4           | 1           | 18         | 6          | N6  |
| S1499c | NEW_1       | NEW_1       | NEW_3       | 21          | 9           | NEW_1      | 26         | N7  |
| VP26b  | NEW_2       | NEW_4       | NEW_4       | 19          | 1           | 1          | 1          | N8  |
| VP28   | NEW_2       | NEW_4       | NEW_4       | 19          | 1           | 1          | 1          | N8  |
| VP28b  | NEW_2       | NEW_4       | NEW_4       | 19          | 1           | 1          | 1          | N8  |
| VP30b  | NEW_2       | NEW_4       | NEW_4       | 19          | 1           | 1          | 1          | N8  |
| S1501d | 5           | 1           | NEW_1       | 4           | 8           | NEW_1      | 6          | N9  |
| S1509d | 6           | 1           | NEW_1       | 4           | 8           | 4          | 12         | N10 |
| S1563d | 6           | 1           | NEW_1       | 4           | 8           | 4          | 12         | N10 |

Supplementary Table S3: MLST-scheme allele definitions and ST-profile definitions for sequenced isolates from this study. Pre-existing allele definitions were taken from the PubMLST website. The described isolate is available within PubMLST.

| Strain ID     | Host  | Lineage (Fig. 7) | Subsp. | Cas1 | Cas2 | Cas3 | Cas4 | Cas5 | Cas6 | Cas7 | Cas8 | Cas9 | CRISPRs | Spacers                 |
|---------------|-------|------------------|--------|------|------|------|------|------|------|------|------|------|---------|-------------------------|
| VP26b         | Deer  | A                | Hyo.   | 1    | 1    | 1    | -    | 1    | 1    | -    | -    | -    | 2       | 30, 36                  |
| VP28          | Deer  | A                | Hyo.   | 1    | 1    | 1    | -    | 1    | 1    | -    | -    | -    | 3       | 36, 25, 7               |
| VP28b         | Deer  | A                | Hyo.   | 1    | 1    | 1    | -    | 1    | 1    | -    | -    | -    | 3       | 36, 25, 7               |
| VP30          | Deer  | A                | Hyo.   | 1    | 1    | 1    | -    | 1    | 1    | -    | -    | -    | 3       | 36, 25, 7               |
| S1559c        | Cow   | B                | Hyo.   | 2    | 2    | 1    | -    | 1    | 1    | -    | -    | 2    | 2       | 46, 56                  |
| S1599c        | Cow   | B                | Hyo.   | 1    | 1    | 1    | -    | 1    | 1    | -    | -    | -    | 3       | 28, 18, 2               |
| S1509d        | Cow   | D                | Hyo.   | 1    | 1    | 1    | -    | 1    | 1    | -    | -    | -    | 2       | 27, 37                  |
| S1563d        | Cow   | D                | Hyo.   | 1    | 1    | 1    | -    | 1    | 1    | -    | -    | -    | 1       | 45                      |
| S1564d        | Cow   | D                | Hyo.   | 1    | 1    | 1    | -    | 1    | 1    | -    | -    | -    | 3       | 49, 7, 13               |
| S1501d        | Cow   | C                | Hyo.   | 1    | 1    | 1    | -    | 1    | 1    | -    | -    | -    | 2       | 32, 46                  |
| S1597b        | Sheep | C                | Hyo.   | 1    | 1    | 1    | -    | 1    | 1    | -    | -    | -    | 4       | 33, 62, 19, 3           |
| S1603d        | Cow   | C                | Hyo.   | 1    | 1    | 1    | -    | 1    | 1    | -    | -    | -    | 1       | 51                      |
| GCF_000705275 | Pig   | E                | Hyo.   | 1    | 1    | 1    | -    | 1    | 1    | -    | -    | -    | 4       | 3, 90, 28, 61           |
| GCF_001643955 | Human | E                | Hyo.   | 2    | 2    | 1    | 1    | 1    | 1    | 1    | -    | 1    | 2       | 6, 113                  |
| GCF_900116585 | Pig   | E                | Hyo.   | 1    | 1    | 1    | -    | 1    | 1    | -    | -    | -    | 7       | 3, 2, 19, 6, 16, 17, 24 |
| S1499c        | Cow   | F                | Hyo.   | 1    | 1    | 1    | -    | 1    | -    | -    | -    | 1    | 1       | 4                       |
| S1547c        | Sheep | E                | Hyo.   | 3    | 2    | 1    | -    | 1    | 1    | -    | -    | 3    | 1       | 18                      |
| S1592a        | Cow   | E                | Hyo.   | 3    | 2    | 1    | -    | 1    | 1    | -    | -    | 3    | 1       | 23                      |
| S1614a        | Cow   | E                | Hyo.   | 3    | 2    | 1    | -    | 1    | 1    | -    | -    | 3    | 1       | 23                      |
| GCF_001643975 | Pig   | E                | Law.   | -    | -    | -    | -    | -    | -    | -    | -    | -    | 0       | -                       |

Supplementary Table S4: Summary of the number of CRISPR/Cas components, spacers and spacer lengths identified within each genome of *C. hyointestinalis*.

| Strain ID     | Subsp. | CDT Subunit A |    |     | CDT Subunit B |    |       | CDT Subunit C |    |     |
|---------------|--------|---------------|----|-----|---------------|----|-------|---------------|----|-----|
|               |        | i             | ii | iii | i             | ii | iii   | i             | ii | iii |
| VP26b         | Hyo.   |               | 1  | 1   |               | 1  |       | 1             |    | 1   |
| VP28          | Hyo.   |               | 1  | 1   |               | 1  |       | 1             |    | 1   |
| VP28b         | Hyo.   |               | 1  | 1   |               | 1  |       | 1             |    | 1   |
| VP30b         | Hyo.   |               | 1  | 1   |               | 1  |       | 1             |    | 1   |
| S1559c        | Hyo.   | 1 (t)         | 1  |     |               | 1  |       | 1             |    | 1   |
| S1599c        | Hyo.   |               | 2  |     | 1             | 1  |       |               | 1  | 1   |
| S1509d        | Hyo.   | 1 (t)         | 1  | 1   |               | 1  |       | 1             |    | 1   |
| S1563d        | Hyo.   | 1 (t)         | 1  | 1   |               | 1  |       | 1             |    | 1   |
| S1564d        | Hyo.   | 1 (t)         | 1  | 1   |               | 1  |       | 1             |    | 1   |
| S1501d        | Hyo.   |               | 1  | 1   |               | 1  | 1 (t) | 1             |    | 1   |
| S1597b        | Hyo.   |               | 1  | 1   |               | 1  | 1 (t) | 1             |    | 1   |
| S1603d        | Hyo.   |               | 1  | 1   |               | 1  | 1 (t) | 1             |    | 1   |
| S1499c        | Hyo.   |               | 1  | 1   |               | 1  |       | 1             |    | 1   |
| S1547c        | Hyo.   |               | 1  |     |               | 1  |       |               |    | 1   |
| S1592a        | Hyo.   |               | 1  |     |               | 1  |       |               |    | 1   |
| S1614a        | Hyo.   |               | 1  |     |               | 1  |       |               |    | 1   |
| GCF_000705275 | Hyo.   |               | 1  |     |               | 1  |       |               |    | 1   |
| GCF_001643955 | Hyo.   |               | 1  |     |               | 1  |       |               |    | 1   |
| GCF_900116585 | Hyo.   |               | 1  |     |               | 1  |       |               |    | 1   |
| GCF_001643975 | Law.   |               | 1  | 1   | 1             |    | 1     | 1             | 1  |     |

Supplementary Table S5: Summary of Cytolethal distending toxin (CDT) subunit types identified within *C. hyointestinalis* genomes sequenced as part of this project. (t) indicates that the gene has been truncated. Subunit types are defined as displayed in Supplementary figure 6.



## Supplementary Data For:

# Updating the genomic taxonomy and epidemiology of *Campylobacter hyointestinalis*.

David A Wilkinson<sup>1\*</sup>, Andrew J O'Donnell<sup>2</sup>, Rukhshana N Akhter<sup>1</sup>, Ahmed Fayaz<sup>1</sup>, Hamish J Mack<sup>1</sup>, Lynn E Rogers<sup>1</sup>, Patrick J Biggs<sup>1,3</sup>, Nigel P French<sup>1,3</sup>, Anne C Midwinter<sup>1</sup>

1 Molecular Epidemiology and Public Health Laboratory (<sup>m</sup>EpiLab), Institute of Veterinary, Animal and Biomedical Sciences, Massey University, Palmerston North, New Zealand

2 Faculty of Veterinary Science, University of Liverpool, Leahurst, Cheshire, CH64 7TE. United Kingdom

3 New Zealand Food Safety Science and Research Centre, Massey University, Palmerston North, New Zealand

\* Denotes corresponding author.

**Correspondence:** E-Mail: D.A.Wilkinson@massey.ac.nz

Telephone: +64 (06) 356 9099 extn 85752

**Correspondence for proofs:** Molecular Epidemiology and Public Health Laboratory (<sup>m</sup>EpiLab), Massey University, Tennent Drive, Private Bag 11-222, Palmerston North, 4442.

Supplementary Data 1: Table of references from the systematic review of *Campylobacter hyointestinalis* publications

| Ref        | Pub Year | Country         | Isolation Method                                                          | Inc. Temp. | Typing Method                                 | Source               | # Tested | # Hyo | Disease   | Comments                                                                              |
|------------|----------|-----------------|---------------------------------------------------------------------------|------------|-----------------------------------------------|----------------------|----------|-------|-----------|---------------------------------------------------------------------------------------|
| THIS STUDY | 2017     | New Zealand     | Bolton broth; mCCDA                                                       | 42         | Linton PCR; WGS                               | Deer faeces          | 80       | 14    | -         | -                                                                                     |
| 1          | 2015     | South Korea     | Solid selective culture medium                                            | 42         | MALDI-TOF (Bruker); 16S PCR sequencing        | Human stool          | 1        | 1     | Diarrhoea | Elderly patient, Immunocompromised                                                    |
| 2          | 2015     | Italy           | CAT agar<br>Preston broth; Karmali agar                                   | 37         | Multiplex PCR; Linton PCR sequencing          | Dog faeces           | 171      | 3     | -         | Isolated infection (same shelter)                                                     |
|            |          |                 |                                                                           |            |                                               | Cat faeces           | 102      | 0     | -         | -                                                                                     |
| 3          | 2015     | Thailand        | mCCDA                                                                     | 37         | 16S PCR sequencing; HipO gene detection       | Human stool          | 2500     | 1     | Diarrhoea | -                                                                                     |
| 4          | 2014     | Canada          | -                                                                         | -          | qPCR                                          | Cattle offal or meat | 309      | 24    | -         | Weak correlation between <i>C. hyointestinalis</i> presence and total bacterial load. |
| 5          | 2014     | Canada          | Bolton broth; Karmali agar                                                | 42         | Multiplex PCR                                 | Cattle faeces        | 935      | 171   | -         | Dairy cows                                                                            |
| 6          | 2014     | Peru            | Cary-Blair transport medium;<br>Blood-free Campylobacter selective medium | 42         | Duplex PCR; 16S PCR sequencing                | Human stool          | 150      | 5     | -         | -                                                                                     |
|            |          | Tanzania        | Cary-Blair transport medium;<br>Solid selective culture medium            | 42         | Duplex PCR; 16S PCR sequencing                | Human stool          | 138      | 17    | -         | Pigs are commonly raised in houses at this location                                   |
|            |          | Bangladesh      | Cary-Blair transport medium;<br>Campy-BAP                                 | 42         | Duplex PCR; 16S PCR sequencing                | Human stool          | 144      | 6     | -         | -                                                                                     |
| 7          | 2013     | Japan           | mCCDA<br>Preston Broth; mCCDA                                             | 42         | API Campy; 16S PCR sequencing                 | Boar faeces          | 121      | 21    | -         | Nalidixic acid resistant                                                              |
|            |          |                 | mCCDA<br>Preston Broth; mCCDA                                             | 42         | API Campy; 16S PCR sequencing                 | Deer faeces          | 128      | 0     | -         | -                                                                                     |
| 8          | 2013     | Italy           | Bolton Broth; mCCDA; Preston selective medium; Skirrow selective medium   | 37         | Multiplex PCR; Duplex PCR; 16S PCR sequencing | Raw Buffalo milk     | 14       | 0     | -         | Milk in-line filter was tested.                                                       |
|            |          |                 | Bolton Broth; mCCDA; Preston selective medium; Skirrow selective medium   | 37         | Multiplex PCR; Duplex PCR; 16S PCR sequencing | Raw cow milk         | 182      | 8     | -         | Milk in-line filter was tested.                                                       |
| 9          | 2013     | The Netherlands | NS                                                                        | NS         | MLST                                          | Dog faeces           | 315      | 25    | -         | <i>C. hyointestinalis</i> classification also includes <i>C.</i>                      |

|    |      | nds         |                                  |      |                                                                     |                               |      |     |                             | <i>fetus</i>                                                                                        |
|----|------|-------------|----------------------------------|------|---------------------------------------------------------------------|-------------------------------|------|-----|-----------------------------|-----------------------------------------------------------------------------------------------------|
|    |      |             | NS                               | NS   | MLST                                                                | Cat faeces                    | 109  | 0   | -                           | <i>C. hyointestinalis</i> classification also includes <i>C. fetus</i>                              |
| 10 | 2012 | Ireland     | mCCDA                            | 42   | EntericBio system; Species-specific Uniplex PCR; 16S PCR sequencing | Human stool                   | 436  | 4   | Diarrhoea                   | -                                                                                                   |
| 11 | 2011 | South Korea | -                                | -    | 16S PCR sequencing                                                  | Human gastro-intestinal tract | 20   | 12  | Unspecified Gastric disease | All Giemsa-positive histological samples from endoscopy.                                            |
| 12 | 2011 | Spain       | Preston broth; Campyloset plates | 42   | Multiplex PCR; 16S PCR sequencing                                   | Cattle faeces                 | 206  | 86  | -                           | -                                                                                                   |
|    |      |             |                                  |      |                                                                     | Sheep faeces                  | 120  | 2   | -                           | -                                                                                                   |
|    |      |             |                                  |      |                                                                     | Pig faeces                    | 17   | 2   | -                           | -                                                                                                   |
| 13 | 2011 | Canada      | -                                | -    | Species-specific Uniplex PCR; 16S PCR sequencing                    | Human stool                   | 442  | 8   | Diarrhoea                   | <i>C. hyointestinalis</i> was not detected by culture, by detected in low prevalence by PCR.        |
|    |      |             |                                  |      |                                                                     | Human stool                   | 58   | 0   | -                           | -                                                                                                   |
| 14 | 2011 | Ireland     | -                                | -    | EntericBio system; Species-specific Uniplex PCR; 16S PCR sequencing | Human stool                   | 7194 | 5   | Diarrhoea                   | -                                                                                                   |
| 15 | 2010 | South Korea | -                                | -    | 16S PCR sequencing                                                  | Human gastro-intestinal tract | 51   | 1   | Gastric adenocarcinomas     | -                                                                                                   |
| 16 | 2009 | Nigeria     | mCCDA                            | 42   | Phenotypic characterisation and Biotyping                           | Cattle faeces                 | 126  | 4   | -                           | -                                                                                                   |
| 17 | 2007 | Finland     | mCCDA<br>Bolton broth; mCCDA     | 41.5 | Serotyping; PFGE                                                    | Cattle faeces                 | 952  | 103 | -                           | <i>C. hyointestinalis</i> only detected after enrichment<br>Monthly prevalence ranged from 5% - 23% |
|    |      |             |                                  |      |                                                                     | Cattle offal or meat          | 948  | 2   | -                           | <i>C. hyointestinalis</i> only detected after enrichment                                            |
| 18 | 2006 | Austria     | -                                |      | Multiplex PCR                                                       | Chicken faeces                | 31   | 0   | -                           | -                                                                                                   |
|    |      |             |                                  |      |                                                                     | Human faeces                  | 10   | 0   | -                           | -                                                                                                   |
|    |      |             |                                  |      |                                                                     | Pig faeces                    | 2    | 1   | -                           | -                                                                                                   |
| 19 | 2006 | Canada      | mCCDA; cCCDA; eCCDA              | 42   | Phenotypic characterisation; Uniplex PCR                            | Cattle faeces                 | 7738 | 4   | -                           | Cattle were systematically treated with antibiotics for                                             |



|    |      |         |                                                                               |        |                                                                                |                       |      |      |                         |                                                                                                                                                           |
|----|------|---------|-------------------------------------------------------------------------------|--------|--------------------------------------------------------------------------------|-----------------------|------|------|-------------------------|-----------------------------------------------------------------------------------------------------------------------------------------------------------|
|    |      |         |                                                                               |        |                                                                                |                       |      |      |                         | production.<br>Ciprofloxacin and erythromycin resistant <i>C. hyointestinalis</i> variants were isolated.                                                 |
| 20 | 2005 | Canada  | brain heart infusion broth; mCCDA; cCCDA; eCCDA                               | 42     | 23S PCR sequencing                                                             | Cattle faeces         | 3283 | 1518 | -                       | Cattle were experimentally treated with antibiotics. Tetracycline, erythromycin and ampicillin resistant <i>C. hyointestinalis</i> variants were isolated |
| 21 | 2004 | Canada  | -                                                                             | -      | 16S PCR sequencing                                                             | Cattle faeces         | 299  | 23   | -                       | 60 animals, maintained in experimental feed lot, sampled on 5 occasions                                                                                   |
| 22 | 2003 | Canada  | -                                                                             | -      | Uniplex PCR                                                                    | Cattle faeces         | 382  | 30   | -                       | -                                                                                                                                                         |
| 23 | 2004 | UK      | Campylobacter enrichment broth; Campylobacter blood-free agar (CA supplement) | 42     | Uniplex PCR                                                                    | Cattle faeces         | 1014 | 7    | -                       | -                                                                                                                                                         |
|    |      |         |                                                                               |        |                                                                                | Bird faeces           | 180  | 1    |                         |                                                                                                                                                           |
|    |      |         |                                                                               |        |                                                                                | Sheep faeces          | 24   | 0    |                         |                                                                                                                                                           |
|    |      |         |                                                                               |        |                                                                                | Other wildlife faeces | 271  | 0    |                         |                                                                                                                                                           |
|    |      |         |                                                                               |        |                                                                                | Environmental sample  | 1152 | 0    |                         |                                                                                                                                                           |
| 24 | 2002 | Finland | CAT broth; CAT agar                                                           | 37     | Phenotypic characterisation; SDS-PAGE; DNA-DNA hybridisation; 23S RFLPCR, PFGE | Reindeer faeces       | 399  | 24   | -                       | All isolates Nalidixic acid resistant                                                                                                                     |
| 25 | 2002 | Austria | mCCDa                                                                         | 37; 42 | Phenotypic characterisation; API Campy; 16S PCR sequencing; PFGE               | Human stool           | 1    | 1    | Chronic Diarrhoea       | Elderly patient. Infected from a pig. All isolates Nalidixic acid resistant                                                                               |
|    |      |         |                                                                               |        |                                                                                | Pig faeces            | 16   | 2    | -                       | All isolates Nalidixic acid resistant                                                                                                                     |
| 26 | 1985 | USA     | NS                                                                            | 37     | Phenotypic characterisation; Serotyping                                        | Pig ileum             | 30   | 10   | Proliferative enteritis | -                                                                                                                                                         |
| 27 | 1986 | USA     | Brucella agar + sheep blood                                                   | 35     | Phenotypic characterisation; DNA-DNA hybridisation                             | Human stool           | 1    | 1    | Diarrhoea               | -                                                                                                                                                         |
| 28 | 1986 | USA     | Mueller-Hinton agar, 5 % defibrinated sheep blood                             | 37     | Phenotypic tests; Microagglutination Test                                      | Pig ileum             | 14   | 5    | Chronic diarrhoea       | -                                                                                                                                                         |
| 29 | 1987 | USA     | NS                                                                            | NS     | Phenotypic tests; Fatty-acid content chromatography; DNA-                      | Human stool           | 4    | 4    | Chronic diarrhoea       | All isolates Nalidixic acid resistant                                                                                                                     |

|    |      |                 |                                                                                         |        | DNA hybridisation                      |                          |      |     |                   |                                                                                                                                                                                                                                                              |
|----|------|-----------------|-----------------------------------------------------------------------------------------|--------|----------------------------------------|--------------------------|------|-----|-------------------|--------------------------------------------------------------------------------------------------------------------------------------------------------------------------------------------------------------------------------------------------------------|
| 30 | 1987 | Australia       | CSB; CA; aerobic incubation                                                             | NS     | Phenotypic tests                       | Deer faeces              | 24   | 23  | Chronic diarrhoea | All isolates Nalidixic acid resistant                                                                                                                                                                                                                        |
| 31 | 1988 | France          | Rogol broth enrichment medium; Columbia blood agar + horse defibrinated blood + Skirrow | 42     | Phenotypic tests                       | Human stool              | 1    | 1   | Diarrhoea         | Immunocompromised patient                                                                                                                                                                                                                                    |
| 32 | 1988 | UK              | -                                                                                       | -      | Phenotypic tests; Serological analysis | Cattle faeces            | 497  | 165 | -                 | Study classified isolates, did not measure prevalence of infection                                                                                                                                                                                           |
|    |      |                 |                                                                                         |        |                                        | Sheep faeces             | 51   | 0   | -                 | Study classified isolates, did not measure prevalence of infection                                                                                                                                                                                           |
| 33 | 1989 | Turkey          | Skirrow selective agar                                                                  | 37     | Phenotypic tests                       | Cattle faeces            | 14   | 12  | Diarrhoea         | -                                                                                                                                                                                                                                                            |
| 34 | 1992 | USA             | -                                                                                       | -      | SDS-PAGE, RFPCR, DNA-DNA hybridisation | Non-human primate faeces | 18   | 7   | -                 | Study classified isolates, did not measure prevalence of infection                                                                                                                                                                                           |
| 35 | 1993 | Japan           | Preston enrichment broth; Skirrow agar                                                  | 37     | Phenotypic tests                       | Cattle faeces            | 94   | 22  | -                 | <i>C. hyointestinalis</i> was only isolated in enriched broth, due to low bacterial loads. Calves showed higher levels of <i>C. jejuni</i> infection. Adult cows had equivalent <i>C. jejuni</i> , <i>C. fetus</i> and <i>C. hyointestinalis</i> prevalence. |
| 36 | 1997 | The Netherlands | CCD broth, CCDA                                                                         | 42     | Phenotypic tests, SDS PAGE, RAPD       | Shellfish (marine water) | 59   | 1   | -                 | -                                                                                                                                                                                                                                                            |
| 37 | 1998 | UK              | CAT broth; CAT agar, mCCDA, Karmali agar                                                | 37     | Phenotypic tests, API Campy            | Cattle faeces            | 158  | 49  | -                 | -                                                                                                                                                                                                                                                            |
| 38 | 1998 | UK              | mCCDA                                                                                   | 37     | Phenotypic tests; 16S PCR sequencing   | Human stool              | 200  | 1   | Gastroenteritis   | -                                                                                                                                                                                                                                                            |
| 39 | 1999 | Switzerland     | Campyloset agar                                                                         | 37     | DNA-DNA hybridisation                  | Cattle faeces            | 1521 | 203 | -                 | Animals were all calves.                                                                                                                                                                                                                                     |
| 40 | 1999 | UK              | mCCDA                                                                                   | 41-42  | Uniplex PCR, PCR-ELISA                 | Human stool              | 3738 | 3   | Gastroenteritis   | -                                                                                                                                                                                                                                                            |
| 41 | 2000 | Japan           | mBlaser                                                                                 | 42     | Phenotypic tests, SDS PAGE, RAPD       | Elephant faeces          | 1    | 1   | -                 | All animals were zoo animals                                                                                                                                                                                                                                 |
|    |      |                 | CEM, mBlaser; mBlaser                                                                   | 37, 42 | Phenotypic tests, SDS PAGE, RAPD       | Non-Human primate faeces | 15   | 10  | -                 | All animals were zoo animals                                                                                                                                                                                                                                 |

|    |      |                    |                                                                             |      |                                                            |                              |        |     |                                                      |                                                                                                                    |
|----|------|--------------------|-----------------------------------------------------------------------------|------|------------------------------------------------------------|------------------------------|--------|-----|------------------------------------------------------|--------------------------------------------------------------------------------------------------------------------|
| 42 | 2009 | Finland            | Bolton broth; mCCDA                                                         | 41.5 | Phenotypic tests, PFGE                                     | Cattle faeces                | 340    | 52  | -                                                    | -                                                                                                                  |
| 43 | 2002 | Italy              | Preston broth + horse blood + preston supplement, mCCDA                     | 42   | Phenotypic tests                                           | Cattle faeces and meat       | 890    | 16  |                                                      | Numbers are approximate, isolation was carried out on pooled samples, and typing was not completed for all samples |
|    |      |                    |                                                                             |      |                                                            | Pig faeces and meat          | 1040   | 16  |                                                      | Numbers are approximate, isolation was carried out on pooled samples, and typing was not completed for all samples |
| 44 | 2006 | Belgium            | Butzler agar + sheep blood                                                  | 42   | Phenotypic tests                                           | Human stool                  | 73,136 | 2   | Gastroenteritis                                      | -                                                                                                                  |
| 45 | 2002 | Denmark            | Preston broth; mCCDA                                                        | 41.5 | Phenotypic tests, Serotyping, PFGE                         | Cattle faeces                | 332    | >1  | -                                                    | Exact numbers not specified for <i>C. hyointestinalis</i>                                                          |
| 46 | 2014 | UK                 | Campylobacter enrichment broth + CVTC; CSA agar                             | 37   | 16S PCR sequencing, multiplex PCR, uniplex PCR, duplex PCR | Cattle faeces                | 3300   | 380 | -                                                    | -                                                                                                                  |
| 47 | 2012 | Pan-Europe         | NS                                                                          | NS   | NS                                                         | Mixed animal samples         | 1624   | 15  | -                                                    | Study focuses on antimicrobial resistance in isolates, not on typing and host-association.                         |
| 48 | 2012 | Nigeria            | Skirrow broth; Skirrow agar                                                 | 37   | Phenotypic tests                                           | Cattle cervico-vaginal mucus | 36     | 3   | -                                                    | -                                                                                                                  |
| 49 | 2011 | Australia          | -                                                                           | -    | 16S PCR Sequencing                                         | Human gastrointestinal tract | 132    | 4   | Inflammatory Bowel Disease; Crohn's Disease; Healthy | -                                                                                                                  |
| 50 | 2006 | Finland and Norway | Preston broth, Preston agar                                                 | 37   | Phenotypic tests, ApiCampy                                 | Reindeer faeces              | 2243   | 1   | -                                                    | -                                                                                                                  |
| 51 | 2012 | USA                | Filtration, ABA agar                                                        | 37   | MALDI-TOF, Multiplex PCR, 16S PCR sequencing, MLST         | Pig faeces                   | 30     | 1   | -                                                    | -                                                                                                                  |
| 52 | 2008 | USA                | -                                                                           | -    | 16S metagenomics                                           | Non-human primate faeces     | 1      | 1   | -                                                    | Species classification is broad                                                                                    |
| 53 | 2014 | The Netherlands    | Sheep blood agar, CCD agar, Preston agar, Skirrow agar, membrane filtration | 37   | Uniplex PCR, 16S PCR sequencing, AFLP                      | Tortoise faeces              | 154    | 9   | -                                                    | -                                                                                                                  |
| 54 | 2011 | Hungary            | mCCDA                                                                       | NS   | 16S PCR Sequencing                                         | Pig faeces                   | 480    | 3   | -                                                    | -                                                                                                                  |

|    |      |                    |                                                                                |             |                                                 |                        |              |    |           |                                                                           |
|----|------|--------------------|--------------------------------------------------------------------------------|-------------|-------------------------------------------------|------------------------|--------------|----|-----------|---------------------------------------------------------------------------|
| 55 | 1999 | UK                 | Ambig.                                                                         | Ambig.      | Phenotypic tests, PFGE                          | Cattle faeces          | 26           | 4  | -         | -                                                                         |
| 56 | 2010 | Rwanda             | Campylobacter thioglycollate enrichment medium, Campylobacter-selective medium | 2-4, 42     | RAPID PCR Sequencing                            | Human stool            | 18           | 1  | -         | -                                                                         |
| 57 | 2012 | Tanzania           | Ambig.                                                                         | NS          | 16S PCR Sequencing                              | Human stool            | 205          | 1  | NS        | -                                                                         |
| 58 | 2005 | Portugal           | -                                                                              | -           | 16S PCR Sequencing                              | Human stool            | 807          | 1  | -         | Study classified existing clinical isolates                               |
| 59 | 2003 | Belgium            | Preston broth, mCCDA                                                           | 42          | 16S PCR Sequencing                              | Cattle faeces          | 2            | 1  | -         | -                                                                         |
| 60 | 2015 | Thailand           | -                                                                              | -           | 16S PCR Sequencing, PFGE, DNA-DNA hybridisation | Human stool            | 2500         | 1  | Diarrhoea | -                                                                         |
| 61 | 2015 | Nigeria            | mCCDA                                                                          | 42          | Phenotypic tests                                | Human stool            | 94           | 5  | -         | -                                                                         |
|    |      |                    |                                                                                |             |                                                 | Pig faeces             | 278          | 5  | -         | -                                                                         |
| 62 | 2013 | Nigeria            | mCCDA                                                                          | 42          | Phenotypic tests                                | Environmental water    | 74           | 1  | -         | -                                                                         |
| 63 | 2012 | New Zealand        | mCCDA                                                                          | 42          | multiplex PCR, 16S PCR Sequencing               | Goat faeces            | 249          | 10 | -         | -                                                                         |
| 64 | 2007 | Northern Ireland   | mCCDA                                                                          | 37, 42      | RAPD, PFGE                                      | Cattle faeces          | 220          | 15 | -         | -                                                                         |
| 65 | 2007 | Switzerland        | NS                                                                             | NS          | AFLP, PFGE                                      | Cattle faeces          | 65           | 1  | -         | Isolates characterised from a culture collection established over 6 years |
| 66 | 2006 | The Netherlands    | Preston Broth, mCCDA                                                           | 41.5        | AFLP                                            | Mouse faeces           | 83           | 1  | -         | Rodents caught close to pigs on organic farm.                             |
| 67 | 2006 | Bangladesh         | Brucella agar + sheep blood                                                    | 42          | Penner serotyping                               | Human stool            | 7128         | 0  | Diarrhoea | -                                                                         |
|    |      | South Africa       | antibiotic-free tryptose blood agar + horse blood                              | 37          | Penner serotyping                               | Human stool            | 5635         | 13 | Diarrhoea | -                                                                         |
| 68 | 2004 | Germany, Italy, UK | mCCDA                                                                          | 42          | Phenotypic tests, Multiplex PCR                 | Cattle faeces          | Approx.. 600 | 11 | -         | -                                                                         |
| 69 | 2004 | Finland, Norway    | Preston Broth, Preston agar                                                    | 37          | Not specified                                   | Reindeer faeces        | 2243         | 1  | -         | -                                                                         |
| 70 | 2002 | Australia          | Preston Broth, mCCDA                                                           | 42          | Phenotypic tests, Uniplex PCR                   | Ruminant meat or offal | 210          | 13 | -         | Intestinal tripe for consumption tested.                                  |
| 71 | 1998 | UK                 | Preston Broth, mCCDA                                                           | 37 (4h), 42 | Phenotypic tests                                | Sheep meat or offal    | 1250         | 10 | -         | -                                                                         |
|    |      |                    |                                                                                |             |                                                 | Sheep faeces           | 252          | 8  | -         | -                                                                         |

|    |      |              |                                                   |    |                        |                      |      |    |                                           |                                                                                             |
|----|------|--------------|---------------------------------------------------|----|------------------------|----------------------|------|----|-------------------------------------------|---------------------------------------------------------------------------------------------|
| 72 | 1988 | Australia    | FBP Broth, Preston Broth,<br>Preston Agar         | 42 | Phenotypic tests       | Cattle faeces        | 120  | 66 | -                                         | -                                                                                           |
|    |      |              |                                                   |    |                        | Cattle offal or meat | 112  | 75 | -                                         | -                                                                                           |
| 73 | 2008 | South Africa | Antibiotic-free blood agar                        | 37 | Phenotypic tests       | Human stool          | 3877 | 51 | Diarrhoea                                 | Summary of the original Cape Town protocol findings (Le Roux, E. and Lastovica, A. J. 1998) |
| 74 | 1983 | USA          | Mueller-Hinton agar, 5 % defibrinated sheep blood | 37 | Phenotypic tests       | Pig faeces           | 27   | 18 | Proliferative ileitis                     |                                                                                             |
|    |      |              |                                                   |    |                        |                      | 1    | 21 | Non-proliferative ileitis enteric disease |                                                                                             |
| 75 | 1992 | Canada       | CCDA                                              | 42 | Phenotypic tests, PFGE | Human stool          | 5    | 5  | Diarrhoea                                 | Source of infection was likely raw milk (cattle)                                            |

## **REFERENCES:**

- 1 Kim do, K. *et al.* Campylobacter hyointestinalis isolated from a human stool specimen. *Ann Lab Med* **35**, 657-659, doi:10.3343/alm.2015.35.6.657 (2015).
- 2 Giacomelli, M., Follador, N., Coppola, L. M., Martini, M. & Piccirillo, A. Survey of Campylobacter spp. in owned and unowned dogs and cats in Northern Italy. *Vet J* **204**, 333-337, doi:10.1016/j.tvjl.2015.03.017 (2015).
- 3 Samosornsuk, W. *et al.* Isolation and Characterization of Campylobacter Strains from Diarrheal Patients in Central and Suburban Bangkok, Thailand. *Jpn J Infect Dis* **68**, 209-215, doi:10.7883/yoken.JIID.2014.229 (2015).
- 4 Trokhymchuk, A., Waldner, C., Chaban, B., Gow, S. & Hill, J. E. Prevalence and diversity of Campylobacter species in Saskatchewan retail ground beef. *J Food Prot* **77**, 2106-2110, doi:10.4315/0362-028X.JFP-14-247 (2014).
- 5 Guevremont, E., Lamoureux, L., Loubier, C. B., Villeneuve, S. & Dubuc, J. Detection and characterization of Campylobacter spp. from 40 dairy cattle herds in Quebec, Canada. *Foodborne Pathog Dis* **11**, 388-394, doi:10.1089/fpd.2013.1706 (2014).
- 6 Platts-Mills, J. A. *et al.* Detection of Campylobacter in stool and determination of significance by culture, enzyme immunoassay, and PCR in developing countries. *J Clin Microbiol* **52**, 1074-1080, doi:10.1128/JCM.02935-13 (2014).
- 7 Sasaki, Y. *et al.* Prevalence and antimicrobial susceptibility of foodborne bacteria in wild boars (*Sus scrofa*) and wild deer (*Cervus nippon*) in Japan. *Foodborne Pathog Dis* **10**, 985-991, doi:10.1089/fpd.2013.1548 (2013).
- 8 Serraino, A. *et al.* Presence of Campylobacter and Arcobacter species in in-line milk filters of farms authorized to produce and sell raw milk and of a water buffalo dairy farm in Italy. *J Dairy Sci* **96**, 2801-2807, doi:10.3168/jds.2012-6249 (2013).
- 9 Mughini Gras, L. *et al.* Increased risk for Campylobacter jejuni and C. coli infection of pet origin in dog owners and evidence for genetic association between strains causing infection in humans and their pets. *Epidemiol Infect* **141**, 2526-2535, doi:10.1017/S0950268813000356 (2013).
- 10 Bullman, S., O'Leary, J., Corcoran, D., Sleator, R. D. & Lucey, B. Molecular-based detection of non-culturable and emerging campylobacteria in patients presenting with gastroenteritis. *Epidemiol Infect* **140**, 684-688, doi:10.1017/S0950268811000859 (2012).
- 11 Seo, T. H. *et al.* The origin of non-H. pylori-related positive Giemsa staining in human gastric biopsy specimens: A prospective study. *Dig Liver Dis* **43**, 23-27, doi:10.1016/j.dld.2010.04.006 (2011).
- 12 Oporto, B. & Hurtado, A. Emerging thermotolerant Campylobacter species in healthy ruminants and swine. *Foodborne Pathog Dis* **8**, 807-813, doi:10.1089/fpd.2010.0803 (2011).
- 13 Inglis, G. D., Boras, V. F. & Houde, A. Enteric campylobacteria and RNA viruses associated with healthy and diarrheic humans in the Chinook health region of southwestern Alberta, Canada. *J Clin Microbiol* **49**, 209-219, doi:10.1128/JCM.01220-10 (2011).
- 14 Bullman, S. *et al.* Emerging dynamics of human campylobacteriosis in Southern Ireland. *FEMS Immunol Med Microbiol* **63**, 248-253, doi:10.1111/j.1574-695X.2011.00847.x (2011).
- 15 Han, H. S., Lee, K. Y., Lim, S. D., Kim, W. S. & Hwang, T. S. Molecular identification of Helicobacter DNA in human gastric adenocarcinoma tissues using Helicobacter species-specific 16S rRNA PCR amplification and pyrosequencing analysis. *Oncol Lett* **1**, 555-558, doi:10.3892/ol\_00000098 (2010).
- 16 Salihu, M. D. *et al.* Isolation and prevalence of Campylobacter species in cattle from Sokoto state, Nigeria. *Vet Ital* **45**, 501-505 (2009).
- 17 Hakkinen, M., Heiska, H. & Hanninen, M. L. Prevalence of Campylobacter spp. in cattle in Finland and antimicrobial susceptibilities of bovine Campylobacter jejuni strains. *Appl Environ Microbiol* **73**, 3232-3238, doi:10.1128/AEM.02579-06 (2007).

- 18 Neubauer, C. & Hess, M. Detection and identification of food-borne pathogens of the genera *Campylobacter*, *Arcobacter* and *Helicobacter* by multiplex PCR in poultry and poultry products. *J Vet Med B Infect Dis Vet Public Health* **53**, 376-381, doi:10.1111/j.1439-0450.2006.00991.x (2006).
- 19 Inglis, G. D. *et al.* Temporal prevalence of antimicrobial resistance in *Campylobacter* spp. from beef cattle in Alberta feedlots. *Appl Environ Microbiol* **72**, 4088-4095, doi:10.1128/AEM.02830-05 (2006).
- 20 Inglis, G. D. *et al.* Effects of subtherapeutic administration of antimicrobial agents to beef cattle on the prevalence of antimicrobial resistance in *Campylobacter jejuni* and *Campylobacter hyointestinalis*. *Appl Environ Microbiol* **71**, 3872-3881, doi:10.1128/AEM.71.7.3872-3881.2005 (2005).
- 21 Inglis, G. D., Kalischuk, L. D. & Busz, H. W. Chronic shedding of *Campylobacter* species in beef cattle. *J Appl Microbiol* **97**, 410-420, doi:10.1111/j.1365-2672.2004.02313.x (2004).
- 22 Inglis, G. D., Kalischuk, L. D. & Busz, H. W. A survey of *Campylobacter* species shed in faeces of beef cattle using polymerase chain reaction. *Can J Microbiol* **49**, 655-661, doi:10.1139/w03-087 (2003).
- 23 Brown, P. E. *et al.* Frequency and spatial distribution of environmental *Campylobacter* spp. *Appl Environ Microbiol* **70**, 6501-6511, doi:10.1128/AEM.70.11.6501-6511.2004 (2004).
- 24 Hanninen, M. L. *et al.* *Campylobacter hyointestinalis* subsp. *hyointestinalis*, a common *Campylobacter* species in reindeer. *J Appl Microbiol* **92**, 717-723 (2002).
- 25 Gorkiewicz, G., Feierl, G., Zechner, R. & Zechner, E. L. Transmission of *Campylobacter hyointestinalis* from a pig to a human. *J Clin Microbiol* **40**, 2601-2605 (2002).
- 26 Gebhart, C. J., Ward, G. E. & Kurtz, H. J. In vitro activities of 47 antimicrobial agents against three *Campylobacter* spp. from pigs. *Antimicrob Agents Chemother* **27**, 55-59 (1985).
- 27 Fennell, C. L. *et al.* Isolation of "*Campylobacter hyointestinalis*" from a human. *J Clin Microbiol* **24**, 146-148 (1986).
- 28 Wilson, T. M. *et al.* Porcine proliferative enteritis: serological, microbiological and pathological studies from three field epizootics. *Can J Vet Res* **50**, 217-220 (1986).
- 29 Edmonds, P. *et al.* *Campylobacter hyointestinalis* associated with human gastrointestinal disease in the United States. *J Clin Microbiol* **25**, 685-691 (1987).
- 30 Hill, B. D., Thomas, R. J. & Mackenzie, A. R. *Campylobacter hyointestinalis*-associated enteritis in Moluccan rusa deer (*Cervus timorensis* subsp. *Moluccensis*). *J Comp Pathol* **97**, 687-694 (1987).
- 31 Minet, J., Grosbois, B. & Megraud, F. *Campylobacter hyointestinalis*: an opportunistic enteropathogen? *J Clin Microbiol* **26**, 2659-2660 (1988).
- 32 Terzolo, H. R. Identification of campylobacters from bovine and ovine faeces. *Rev Argent Microbiol* **20**, 53-68 (1988).
- 33 Diker, K. S., Diker, S. & Ozlem, M. B. Bovine diarrhea associated with *Campylobacter hyointestinalis*. *Zentralbl Veterinarmed B* **37**, 158-160 (1990).
- 34 Russell, R. G., Kiehlbauch, J. A., Gebhart, C. J. & DeTolla, L. J. Uncommon *Campylobacter* species in infant *Macaca nemestrina* monkeys housed in a nursery. *J Clin Microbiol* **30**, 3024-3027 (1992).
- 35 Giacoboni, G. I., Itoh, K., Hirayama, K., Takahashi, E. & Mitsuoka, T. Comparison of fecal *Campylobacter* in calves and cattle of different ages and areas in Japan. *J Vet Med Sci* **55**, 555-559 (1993).
- 36 Endtz, H. P. *et al.* Genotypic diversity of *Campylobacter lari* isolated from mussels and oysters in The Netherlands. *Int J Food Microbiol* **34**, 79-88 (1997).
- 37 Atabay, H. I. & Corry, J. E. The isolation and prevalence of campylobacters from dairy cattle using a variety of methods. *J Appl Microbiol* **84**, 733-740 (1998).

- 38 Lawson, A. J., Shafi, M. S., Pathak, K. & Stanley, J. Detection of campylobacter in gastroenteritis: comparison of direct PCR assay of faecal samples with selective culture. *Epidemiol Infect* **121**, 547-553 (1998).
- 39 Busato, A., Hofer, D., Lentze, T., Gaillard, C. & Burnens, A. Prevalence and infection risks of zoonotic enteropathogenic bacteria in Swiss cow-calf farms. *Vet Microbiol* **69**, 251-263 (1999).
- 40 Lawson, A. J., Logan, J. M., O'Neill G, L., Desai, M. & Stanley, J. Large-scale survey of Campylobacter species in human gastroenteritis by PCR and PCR-enzyme-linked immunosorbent assay. *J Clin Microbiol* **37**, 3860-3864 (1999).
- 41 Misawa, N. *et al.* Isolation of Campylobacter species from zoo animals and polymerase chain reaction-based random amplified polymorphism DNA analysis. *Vet Microbiol* **71**, 59-68 (2000).
- 42 Hakkinen, M. & Hanninen, M. L. Shedding of Campylobacter spp. in Finnish cattle on dairy farms. *J Appl Microbiol* **107**, 898-905, doi:10.1111/j.1365-2672.2009.04269.x (2009).
- 43 Pezzotti, G. *et al.* Occurrence and resistance to antibiotics of Campylobacter jejuni and Campylobacter coli in animals and meat in northeastern Italy. *Int J Food Microbiol* **82**, 281-287 (2003).
- 44 Vandenberg, O. *et al.* Antimicrobial susceptibility of clinical isolates of non-jejuni/coli campylobacters and arcobacters from Belgium. *J Antimicrob Chemother* **57**, 908-913, doi:10.1093/jac/dkl080 (2006).
- 45 Nielsen, E. M. Occurrence and strain diversity of thermophilic campylobacters in cattle of different age groups in dairy herds. *Lett Appl Microbiol* **35**, 85-89 (2002).
- 46 Duncan, J. S., Leatherbarrow, A. J., French, N. P. & Grove-White, D. H. Temporal and farm-management-associated variation in faecal-pat prevalence of Campylobacter fetus in sheep and cattle. *Epidemiol Infect* **142**, 1196-1204, doi:10.1017/S0950268813002379 (2014).
- 47 de Jong, A. *et al.* Pan-European monitoring of susceptibility to human-use antimicrobial agents in enteric bacteria isolated from healthy food-producing animals. *J Antimicrob Chemother* **67**, 638-651, doi:10.1093/jac/dkr539 (2012).
- 48 Mshelia, G. D., Amin, J. D., Egwu, G. O., Woldehiwet, Z. & Murray, R. D. The prevalence of bovine venereal campylobacteriosis in cattle herds in the Lake Chad basin of Nigeria. *Trop Anim Health Prod* **44**, 1487-1489, doi:10.1007/s11250-012-0092-6 (2012).
- 49 Mahendran, V. *et al.* Prevalence of Campylobacter species in adult Crohn's disease and the preferential colonization sites of Campylobacter species in the human intestine. *PLoS One* **6**, e25417, doi:10.1371/journal.pone.0025417 (2011).
- 50 Kemper, N., Aschfalk, A. & Holler, C. Campylobacter spp., Enterococcus spp., Escherichia coli, Salmonella spp., Yersinia spp., and Cryptosporidium oocysts in semi-domesticated reindeer (Rangifer tarandus tarandus) in Northern Finland and Norway. *Acta Vet Scand* **48**, 7, doi:10.1186/1751-0147-48-7 (2006).
- 51 Jay-Russell, M. T., Bates, A., Harden, L., Miller, W. G. & Mandrell, R. E. Isolation of Campylobacter from feral swine (Sus scrofa) on the ranch associated with the 2006 Escherichia coli O157:H7 spinach outbreak investigation in California. *Zoonoses Public Health* **59**, 314-319, doi:10.1111/j.1863-2378.2012.01465.x (2012).
- 52 McKenna, P. *et al.* The macaque gut microbiome in health, lentiviral infection, and chronic enterocolitis. *PLoS Pathog* **4**, e20, doi:10.1371/journal.ppat.0040020 (2008).
- 53 Gilbert, M. J. *et al.* Occurrence, diversity, and host association of intestinal Campylobacter, Arcobacter, and Helicobacter in reptiles. *PLoS One* **9**, e101599, doi:10.1371/journal.pone.0101599 (2014).
- 54 Schweitzer, N. *et al.* Molecular characterization of Campylobacter lanienae strains isolated from food-producing animals. *Foodborne Pathog Dis* **8**, 615-621, doi:10.1089/fpd.2010.0754 (2011).



- 55 On, S. L., Atabay, H. I. & Corry, J. E. Clonality of *Campylobacter sputorum* bv. *paraureolyticus* determined by macrorestriction profiling and biotyping, and evidence for long-term persistent infection in cattle. *Epidemiol Infect* **122**, 175-182 (1999).
- 56 Whittier, C. A., Cranfield, M. R. & Stoskopf, M. K. Real-time PCR detection of *Campylobacter* spp. in free-ranging mountain gorillas (*Gorilla beringei beringei*). *J Wildl Dis* **46**, 791-802, doi:10.7589/0090-3558-46.3.791 (2010).
- 57 Liu, J. *et al.* Simultaneous detection of six diarrhea-causing bacterial pathogens with an in-house PCR-luminex assay. *J Clin Microbiol* **50**, 98-103, doi:10.1128/JCM.05416-11 (2012).
- 58 Menard, A., Dachet, F., Prouzet-Mauleon, V., Oleastro, M. & Megraud, F. Development of a real-time fluorescence resonance energy transfer PCR to identify the main pathogenic *Campylobacter* spp. *Clin Microbiol Infect* **11**, 281-287, doi:10.1111/j.1469-0691.2005.01072.x (2005).
- 59 Herman, L. *et al.* Routes for *Campylobacter* contamination of poultry meat: epidemiological study from hatchery to slaughterhouse. *Epidemiol Infect* **131**, 1169-1180 (2003).
- 60 Samosornsuk, W. *et al.* Isolation and characterization of *Campylobacter* strains from diarrheal patients in Bangkok and its suburb in Thailand. *Japanese Journal of Infectious Diseases* **advpub**, doi:10.7883/yoken.JIID.2014.229 (2015).
- 61 Gwimi, P. *et al.* Prevalence of *Campylobacter* species in fecal samples of pigs and humans from Zuru Kebbi State, Nigeria. *Int J One Health* **2015** **1**, 1-5 (2015).
- 62 Ugboma, A. N., Salihu, M. D., Magaji, A. A. & Abubakar, M. B. Prevalence of *Campylobacter* species in ground water in Sokoto, Sokoto State, Nigeria. *Vet. World* **6**, 285-287 (2013).
- 63 Rapp, D. & Ross, C. Prevalence of six *Campylobacter* species in a New Zealand dairy goat herd. *New Zealand Journal of Agricultural Research* **55**, 235-240 (2012).
- 64 Madden, R., Murray, K. & Gilmour, A. Carriage of four bacterial pathogens by beef cattle in Northern Ireland at time of slaughter. *Letters in applied microbiology* **44**, 115-119 (2007).
- 65 Keller, J., Wieland, B., Wittwer, M., Stephan, R. & Perreten, V. Distribution and genetic variability among *Campylobacter* spp. isolates from different animal species and humans in Switzerland. *Zoonoses and public health* **54**, 2-7 (2007).
- 66 Meerburg, B. G., Jacobs-Reitsma, W. F., Wagenaar, J. A. & Kijlstra, A. Presence of *Salmonella* and *Campylobacter* spp. in wild small mammals on organic farms. *Appl Environ Microbiol* **72**, 960-962, doi:10.1128/AEM.72.1.960-962.2006 (2006).
- 67 Alam, K. *et al.* Clinical characteristics and serotype distribution of *Campylobacter jejuni* and *Campylobacter coli* isolated from diarrhoeic patients in Dhaka, Bangladesh, and Cape Town, South Africa. *Bangladesh Journal of Microbiology* **23**, 121-124 (2006).
- 68 Bywater, R. *et al.* A European survey of antimicrobial susceptibility among zoonotic and commensal bacteria isolated from food-producing animals. *Journal of Antimicrobial Chemotherapy* **54**, 744-754 (2004).
- 69 Kemper, N., Aschfalk, A. & Höller, C. The occurrence and prevalence of potentially zoonotic enteropathogens in semi-domesticated reindeer. *Rangifer* **24**, 15-20 (2004).
- 70 Bensink, J. C., Dobrenov, B., Mulenga, M. P., Bensink, Z. S. & McKee, J. J. The microbiological quality of beef tripe using different processing techniques. *Meat science* **62**, 85-92 (2002).
- 71 Stanley, K., Wallace, J., Currie, J., Diggle, P. J. & Jones, K. Seasonal variation of thermophilic campylobacters in lambs at slaughter. *Journal of Applied Microbiology* **84**, 1111-1116 (1998).
- 72 Grau, F. H. *Campylobacter jejuni* and *Campylobacter hyointestinalis* in the intestinal tract and on the carcasses of calves and cattle. *Journal of Food Protection*® **51**, 857-861 (1988).
- 73 Lastovica, A. J. & Allos, B. M. in *Campylobacter, Third Edition* (American Society of Microbiology, 2008).
- 74 Gebhart, C. J., Ward, G. E., Chang, K. & Kurtz, H. J. *Campylobacter hyointestinalis* (new species) isolated from swine with lesions of proliferative ileitis. *Am J Vet Res* **44**, 361-367 (1983).

- 75 Salama, S. M., Tabor, H., Richter, M. & Taylor, D. E. Pulsed-field gel electrophoresis for epidemiologic studies of *Campylobacter hyointestinalis* isolates. *J Clin Microbiol* **30**, 1982-1984 (1992).

Supplementary Data 2: Table of core genes predicted across non thermophilic *Campylobacter* using wgm1st program genome profiler. functional descriptions were generated using eggnoG\_mapper.

### Supplementary Data 3: Fasta format allele sequences for new MLST alleles.

```
>Chy_aspA_NEW_1
ATGCTTGGCGAAGACATTGACCGCGTAAGAGAAGCTAGAAACCTAGTACGCGAGATAAAC
CTAGGTGGAACAGCTATCGGTACAGGTATCAACTCTCACCCAGACTATCCAAAAGTAGTT
GAGACAAAACCTTCAAGAAGTAACAAAACGTCCATTTATCACTGCTGGTAACCTTATAGAA
GCTACTCAAGACACAGGCGCTTATGTTCAAATTTTCAGGTGTTTTAAAAAGAGTTAGTACA
AAACTAAGTAAAATTTGTAACGACTTAAGACTTCTAAGTAGTGGTCCAAGATGCGGACTA
AATGAGATAAACCTTACCAAAAATGCAACCAGGCTCAAGCATTATGCCGGGTAAAGTAAAT
CCTGTTATCCCTGAAGTAGTAAATCAAGTTTGTTCAGTTATCGGTAATGACGTAAC
GTAACCTTAGCTAGTGAAGGCGGACAACCTTCAACTAAACGTATTTGAACCAGTTATT
>Chy_aspA_NEW_2
ATGCTTGGCGAAGACATCGACCGCGTAAGAGAAGCTAGAAACCTAGTACGCGAGATAAAC
CTAGGTGGAACAGCTATCGGTACAGGTATCAACTCTCACCCAGACTATCCAAAAGTAGTT
GAGACAAAACCTTCAAGAAGTAACAAAACGTCCATTTATCACTGCTGGTAACCTTATAGAA
GCTACTCAAGATACAGGCGCTTATGTTCAAATTTTCAGGTGTTTTAAAAAGAGTTAGTACA
AAACTAAGTAAAATTTGTAACGACTTAAGACTTCTAAGTAGTGGTCCAAGATGCGGACTA
AATGAGATAAACCTTACCAAAAATGCAACCAGGCTCAAGCATTATGCCAGGTAAAGTAAAT
CCTGTTATCCCTGAAGTAGTAAATCAAGTTTGTTCAGTTATCGGTAATGACGTAAC
GTAACCTTAGCTAGTGAAGGCGGACAACCTTCAACTAAACGTATTTGAACCAGTTATC
>Chy_atpA_NEW_1
GCGAGCGCAAGCGACTCTGCGGCGTTCAATATCTAGCTCCATACGCTGGTGTACTATG
GGTGAGTATTTCCGCGATAACTCACGCCATGCACTTATCATCTATGATGATTTGAGTAAG
CATGCTGTGCGATATCGCGAAATGTCATTGATCTTAAGAAGACCGCCAGGTTCGTGAAGCC
TATCCAGGTGATGTTTTCTATCTACATTCAAGACTACTTGAAAGAGCTAGCAAACCTAAGC
GATAAATTAGGAGCAGGAAGTCTTACGGCTCTACCTATTATCGAGACTCAAGCAGGCCGAT
GTTTCAGCTTATATTCCTACGAATGTTATTTCTATCACAGATGGTCAGATTTTCTTGGAG
AGCGACTTGTTTAACTCAGGTATCCGTCCTGCTATTAACGTTGGTCTATCTGTTAGTCGT
GTTGGCGGATCAGCTCAGATCAAAGCTATCAAGAAAGTTTCTGGAACACTTCGTCTTGAT
CTTGCTCAA
>Chy_atpA_NEW_2
GCGAGCGCAAGCGACTCTGCGGCACTTCAATATCTAGCTCCATACGCTGGTGTACTATG
GGTGAGTATTTCCGCGATAACTCACGCCATGCACTTATCATCTATGATGATTTGAGTAAG
CATGCTGTGCGATATCGCGAAATGTCATTGATCTTAAGAAGACCGCCAGGTTCGTGAAGCC
TATCCAGGTGATGTTTTCTATCTACATTCAAGACTACTTGAAAGAGCTAGCAAACCTAAGC
GATAAATTAGGAGCAGGAAGTCTTACGGCTCTACCTATTATCGAGACTCAAGCAGGCCGAT
GTTTCAGCTTATATTCCTACGAATGTTATTTCTATCACAGATGGTCAGATTTTCTTGGAG
AGCGACTTGTTTAACTCAGGTATCCGTCCTGCTATTAACGTTGGTCTATCTGTTAGTCGT
GTTGGCGGATCAGCTCAGATCAAAGCTATCAAGAAAGTTTCTGGAACACTTCGTCTTGAT
CTTGCTCAA
>Chy_atpA_NEW_3
GCGAGCGCAAGCGACTCTGCGGCGTTCAATATCTAGCTCCATACGCTGGTGTACTATG
GGTGAGTATTTCCGCGATAACTCACGCCATGCACTTATCATCTATGATGATTTGAGTAAG
CATGCTGTGCGATATCGCGAAATGTCATTGATCTTAAGAAGACCGCCAGGTTCGTGAAGCC
TATCCAGGTGATGTTTTCTATCTACATTCAAGACTACTTGAAAGAGCTAGCAAACCTAAGC
GATAAATTAGGAGCAGGAAGTCTTACGGCTCTACCTATTATCGAGACTCAAGCAGGCCGAT
GTTTCAGCTTATATTCCTACGAATGTTATTTCTATCACAGATGGTCAGATTTTCTTGGAG
AGCGACTTGTTTAACTCAGGTATCCGTCCTGCTATTAACGTTGGTCTATCTGTTAGTCGT
GTTGGCGGATCAGCTCAGATCAAAGCTATCAAGAAAGTTTCTGGAACACTTCGTCTTGAT
CTTGCTCAA
>Chy_atpA_NEW_4
GCGAGCGCAAGCGACTCTGCGGCGTTCAATATCTAGCTCCATACGCTGGTGTACTATG
GGTGAGTATTTCCGCGATAACTCACGCCATGCACTTATCATCTATGATGATTTGAGTAAG
CATGCTGTGCGATATCGCGAAATGTCATTGATCTTAAGAAGACCGCCAGGTTCGTGAAGCT
TATCCAGGTGATGTTTTCTATCTACATTCAAGACTACTTGAAAGAGCTAGCAAACCTAAGC
GATAAATTAGGAGCAGGAAGTCTTACGGCTCTACCTATTATCGAGACTCAAGCAGGCCGAT
GTTTCAGCTTATATTCCTACGAATGTTATTTCTATCACAGATGGTCAGATTTTCTTGGAG
AGCGACTTGTTTAACTCAGGTATCCGTCCTGCTATTAACGTTGGTCTATCTGTTAGTCGT
```

GTTGGTGGATCAGCTCAGATCAAAGCTATCAAGAAAGTTTCTGGAACACTTCGTCTTGAT  
CTTGCTCAA

>Chy\_glnA\_NEW\_1

GATCCATTTACTGCCGATACCACTATCATAGTAATATGCGATGTTTATGATATATATAAAA  
GGTGAGTTATACGAAAAATGCCCTAGAAGTATAGCTAAAAAGAGCGTCACAATATCTAAGA  
GATAGCGGTATAGGCGACGTTGCTTACTTTGGCCCTGAAAATGAATTCCTTCGTATTTGAT  
AATGTTTCGTATCATCGACAAAACAAAACCTGCGCAATGTACGAAGTAGATACCGAAGAAGGC  
GAATGGAATGACGCTAAAGAGTACAGTGATGGTTATAATACCGGTCACCGACCACGTGCA  
AAAGGTGGATATTTTCTGTTCAACCAATAGATAGTATGGTTGATCTAAGAGCTGAAATG  
GTAAATGTACTTGAGCAAGTCGGACTTGAGACTTTTCGTAGTTCATCATGAAGTCGCTCAA  
GGACAAGGTGAGATAGGCGTCAAATTCGGTACTCTTGTAGAAGCTGCAGATAATGTT

>Chy\_glnA\_NEW\_2

GATCCATTTACTGCCGATACCACTATCATAGTAATATGTGATGTTTATGATATCTATAAAA  
GGTGAGTTATACGAAAAATGCCCTAGAAGTATAGCTAAAAAGAGCGATGCAATATCTAAGA  
GATAGCGGTATAGGCGACGTTGCTTACTTTGGCCCTGAAAATGAATTCCTTCGTATTTGAT  
AATGTTTCGTATCATCGACAAAACAAAACCTGCGCAATGTACGAAGTAGATACCGAAGAAGGC  
GAATGGAATGACGCTAAAGAGTACAGTGATGGTTATAATACCGGTCACCGACCACGTGCA  
AAAGGTGGATATTTTCTGTTCAACCAATAGATAGTATGGTTGATCTAAGAGCTGAAATG  
GTAAATGTACTTGAGCAAGTCGGACTTGAGACTTTTCGTAGTTCATCATGAAGTCGCTCAA  
GGACAAGGTGAGATAGGCGTCAAATTCGGTACTCTTGTAGAAGCTGCAGATAATGTT

>Chy\_glnA\_NEW\_3

GATCCATTTACTGCCGATACCACTATCATAGTAATATGCGATGTTTATGATATATATAAAA  
GGTGAGTTATACGAAAAATGCCCTAGAAGTATAGCTAAAAAGAGCGTCACAATATCTAAGA  
GATAGCGGTATAGGCGACGTTGCTTACTTTGGCCCTGAAAATGAATTCCTTCGTATTTGAT  
AATGTTTCGTATCATCGACAAAACAAAACCTGCGCAATGTACGAAGTAGATACCGAAGAAGGC  
GAATGGAATGACGCTAAAGAGTACAGTGATGGTTATAATACCGGTCACCGCCCACGTGCA  
AAAGGTGGATATTTTCTGTTCAACCAATAGATAGTATGGTTGATCTAAGAGCTGAAATG  
GTAAATGTACTTGAGCAAGTCGGACTTGAGACTTTTCGTAGTTCATCATGAAGTCGCTCAA  
GGACAAGGTGAGATAGGCGTCAAATTCGGTACTCTTGTAGAAGCTGCAGATAATGTT

>Chy\_glnA\_NEW\_4

GATCCATTTACTGCCGATACCACTATCATAGTAATATGCGATGTTTATGATATATATAAAA  
GGTGAGTTATACGAAAAATGCCCTAGAAGTATAGCTAAAAAGAGCGTCACAATATCTAAGA  
GATAGCGGTATAGGCGACGTTGCTTACTTTGGCCCTGAAAATGAATTCCTTCGTATTTGAT  
AATGTTTCGTATCATCGACAAAACAAAACCTGCGCAATGTACGAAGTAGATACCGAAGAAGGC  
GAATGGAATGACGCTAAAGAGTACAGTGATGGTTATAATACCGGTCACCGCCCACGTGCA  
AAAGGTGGATATTTTCTGTTCAACCAAGTAGATAGTATGGTTGATCTAAGAGCTGAAATG  
GTAAATGTACTTGAGCAAGTCGGACTTGAGACTTTTCGTAGTTCATCATGAAGTCGCTCAA  
GGACAAGGTGAGATAGGCGTCAAATTCGGTACTCTTGTAGAAGCTGCAGATAATGTT

>Chy\_pgm\_NEW\_1

GGCGGAAATATAAATTTAAATTGCGGTGCTTTACATCCTGAGAATTTGGCTAAAGAAGTT  
AAACATTTAAGAGCAGATATCGGTTTTGCTTTTGATGGAGATGCCGATAGACTAGTAGTC  
GTCGATGAAAACGGCAGAGTCGTTGATGGCGACGCTCTACTTGGTATTTTAGCGACTTAT  
CTTGATGAAAATAAGATGCTTGATAAAAAAGAGATAGTAGCTACTGTGATGAGCAATGCT  
GCGCTTGATGACTATCTAGCAAAACATAAGATCAAACACTTTCGCTCAAACGTGGGTGAT  
AAATTCGTTCTTGAGATGATGAAAGAAAACGGTATAAATTTTCGGTGGTGAACAGAGCGGT  
CATATTATATTTAGTGATTTTTCAAAGACCGGCGACGGACTTGTTCAGCGCTTCAAGTT  
AGTGCTTGTTTGCTTGCAAAAAGCAAAAAGCAAGTGAGATATTTGACGTTATAAAACCA  
TATCCACAAAAGCTTTTTAAAT

>Chy\_pgm\_NEW\_2

GGCGGAAATATAAATTTAAATTGCGGTGCTTTACATCCTGAGAATTTGGCTAAAGAAGTT  
AAACATTTAAGAGCAGATATCGGTTTTGCTTTTGATGGAGATGCTGATAGACTCGTAGTC  
GTCGATGAAAATGGCAGAGTCGTTGATGGCGACGCTCTACTTGGTATTTTAGCGACTTAT  
CTTGATGAAAATAAGATGCTTGATAAAAAAGAGATAGTAGCTACTGTGATGAGCAATGCT  
GCGCTTGATGACTATCTAGCAAAACATAAGATCAAACACTTTCGCTCAAACGTGGGTGAT  
AAATTCGTTCTTGAGATGATGAAAGAAAACGGTATAAATTTTCGGTGGTGAACAGAGCGGT  
CATATTATATTTAGTGATTTTTCAAAGACCGGCGACGGACTTGTTCAGCGCTTCAAGTT  
AGTGCTTGTTTGCTTGCAAAAAGCAAAAAGCAAGTGAGATATTTGACGTTATAAAACCA  
TATCCACAAAAGCTTTTTAAAT

>Chy\_tkt\_NEW\_1

TTATATCTTAGCGGCTATAATGTTAGCTTAGAGGATTTAAAAAAGTTTAGAAAAGTTGGCT  
CAAAAACCCCTGGTCACCCAGAGATCGAAACTAGCGGCGTAGAGATAGCTACTGGACCTTT  
AGGGCAAGGCGTTGCAAATGCAGTTGGTTTTGCTATGGCTGCAAAAAGTGCGGCAAATTTA  
CTAGGTAGTGAGATCATAAATCATAAAGTTTATTGTCTTTGCGGCGATGGCGATTTAGAAG  
AAGGTATCAGCTACGAGGCTTGTGCTCTTGCTGGAAAACACTGCTTAAATAACTTGGTCAT  
CATATATGATAGCAACAATATCACTATAGAAGGCGATACCTCCATAGCTTGGTGTGAAGAT  
GTAAAAGTACGTTTTGAGGCTGCAGGTTTTGAAGTGCAAAGATAGACGGACACAACCTTTT  
ATGAGATCGAATTTGCTCTAAGCGAGGCTGCG
